# Supplementary material for: Pirfenidone and nintedanib modulate properties of fibroblasts and myofibroblasts in idiopathic pulmonary fibrosis
Source: Springer Nature journal article supplement (doi:10.1186/s12931-016-0328-5), 2016-02-04
Supplement: MOESM1 [file 9759900]

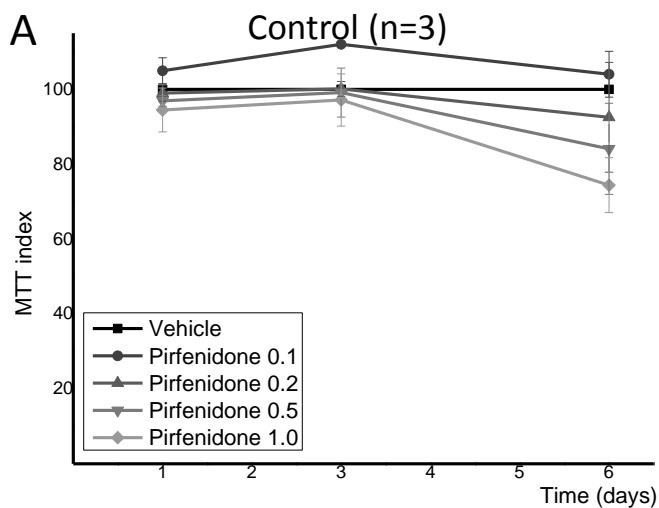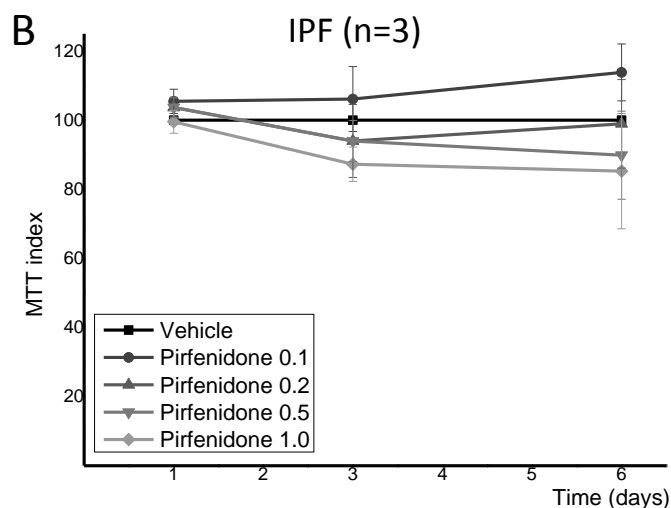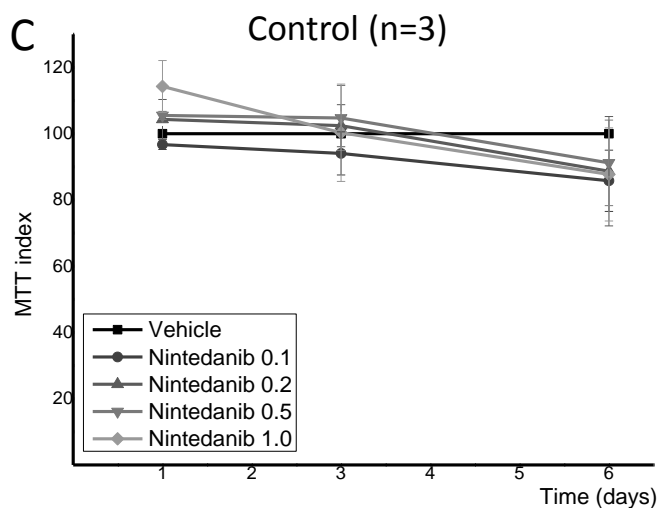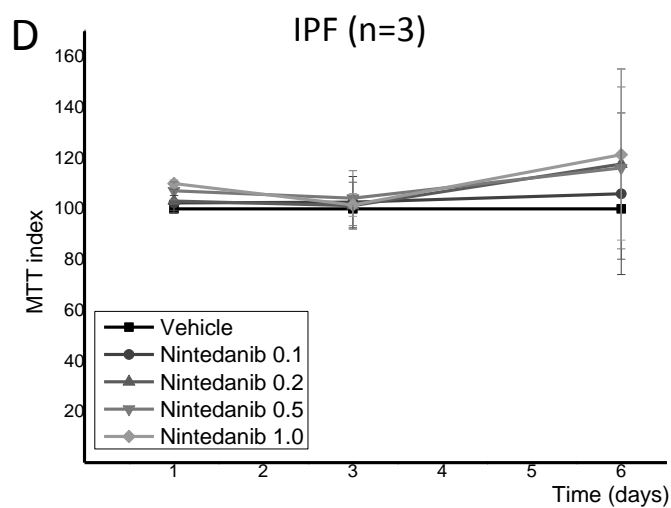

**Additional file 1.** Proliferation of TGF $\beta$ 1 induced stromal cells by pirfenidone (A, B) and by nintedanib (C, D). Six samples were analysed and 3 of them were derived from healthy lung (A, C) and 3 from IPF (B, D). Pirfenidone (0.1 mM-1mM) or nintedanib (0.1-1  $\mu$ M) was added to the sample together with 5 ng/ml TGF $\beta$ 1 at the beginning of the experiment. The values were related to the corresponding control.
