# Supplementary material for: Pirfenidone and nintedanib modulate properties of fibroblasts and myofibroblasts in idiopathic pulmonary fibrosis
Source: Springer Nature journal article supplement (doi:10.1186/s12931-016-0328-5), 2016-02-04
Supplement: MOESM2 [file 9759900]

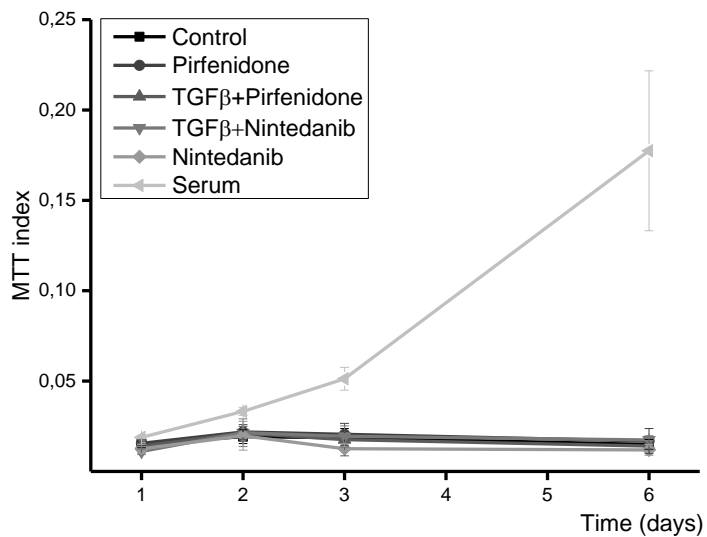

Additional file 2. Proliferation assay performed in collagen gel contraction assay conditions. In these conditions the cells are not proliferating. Serum was used as a positive control to induce the proliferation.
